# Supplementary material for: Disentangling drivers of reproductive performance in urban great tits: a food supplementation experiment
Source: Oxford University Press journal article supplement (doi:10.1242/jeb.161067), 2017-01-01
Supplement: jeb161067supp.pdf [file jeb161067supp.pdf]

Table S1. Proportion used to fill feeders in relation to age and number of nestlings.

| Worms species       | <i>Alphitobius diaperinus</i> |     |      |      |      | <i>Tenebrio molitor</i> |      |          |
|---------------------|-------------------------------|-----|------|------|------|-------------------------|------|----------|
| Days after hatching | 0 or 1                        | 2   | 4    | 6    | 8    | 10                      | 12   | 14 or 15 |
| Nestlings number    | Quantity / Nest (g)           |     |      |      |      |                         |      |          |
| 1                   | 0.5                           | 1   | 1.5  | 2.5  | 2.5  | 2.5                     | 2.5  | 2.5      |
| 2                   | 1                             | 1.5 | 3    | 5    | 5    | 5                       | 5    | 5        |
| 3                   | 1                             | 2.5 | 4.5  | 7.5  | 7.5  | 7.5                     | 7.5  | 7.5      |
| 4                   | 1.5                           | 3   | 6    | 10   | 10   | 10                      | 10   | 10       |
| 5                   | 2                             | 4   | 7.5  | 12.5 | 12.5 | 12.5                    | 12.5 | 12.5     |
| 6                   | 2.5                           | 4.5 | 9    | 15   | 15   | 15                      | 15   | 15       |
| 7                   | 3                             | 5.5 | 10.5 | 17.5 | 17.5 | 17.5                    | 17.5 | 17.5     |
| 8                   | 3                             | 6   | 12   | 20   | 20   | 20                      | 20   | 20       |
| 9                   | 3.5                           | 7   | 13.5 | 22.5 | 22.5 | 22.5                    | 22.5 | 22.5     |

Nutribird complement was providing with worms larvae to be equivalent to 5 gr or 3 ml (a full coffee spoon) at day 6 for a 6-nestling brood. The supply in carotenoids was 0.0015 mg per full coffee spoon.
